# Supplementary material for: Mapping geodetically inferred Antarctic ice height changes into thickness variations: a sensitivity study
Source: Copernicus journal article supplement (doi:10.5194/egusphere-2023-2451), 2023-11-17

crustal deformation from melt 1900-2015 (Schroder et al., 2019)

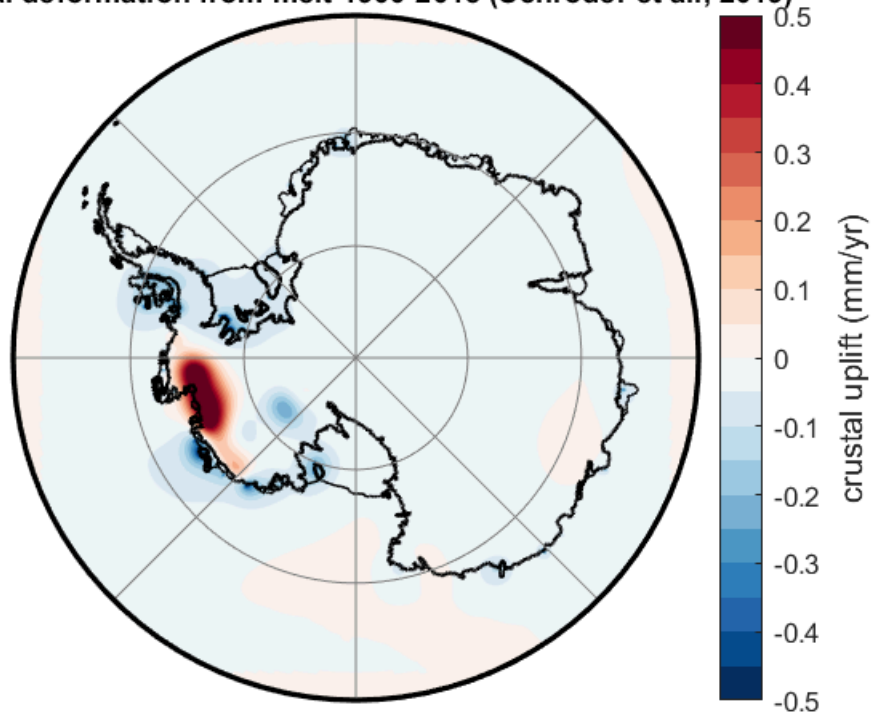

Supplement: Supplementary file [file egusphere-2023-2451-AC2-supplement.zip]
